# Supplementary material for: Preventive Effects of Epigallocatechin-3-O-Gallate against Replicative Senescence Associated with p53 Acetylation in Human Dermal Fibroblasts
Source: Hindawi journal article supplement (doi:10.1155/2012/850684), 2012-01-01
Supplement: f1 [file 850684.f1.docx]

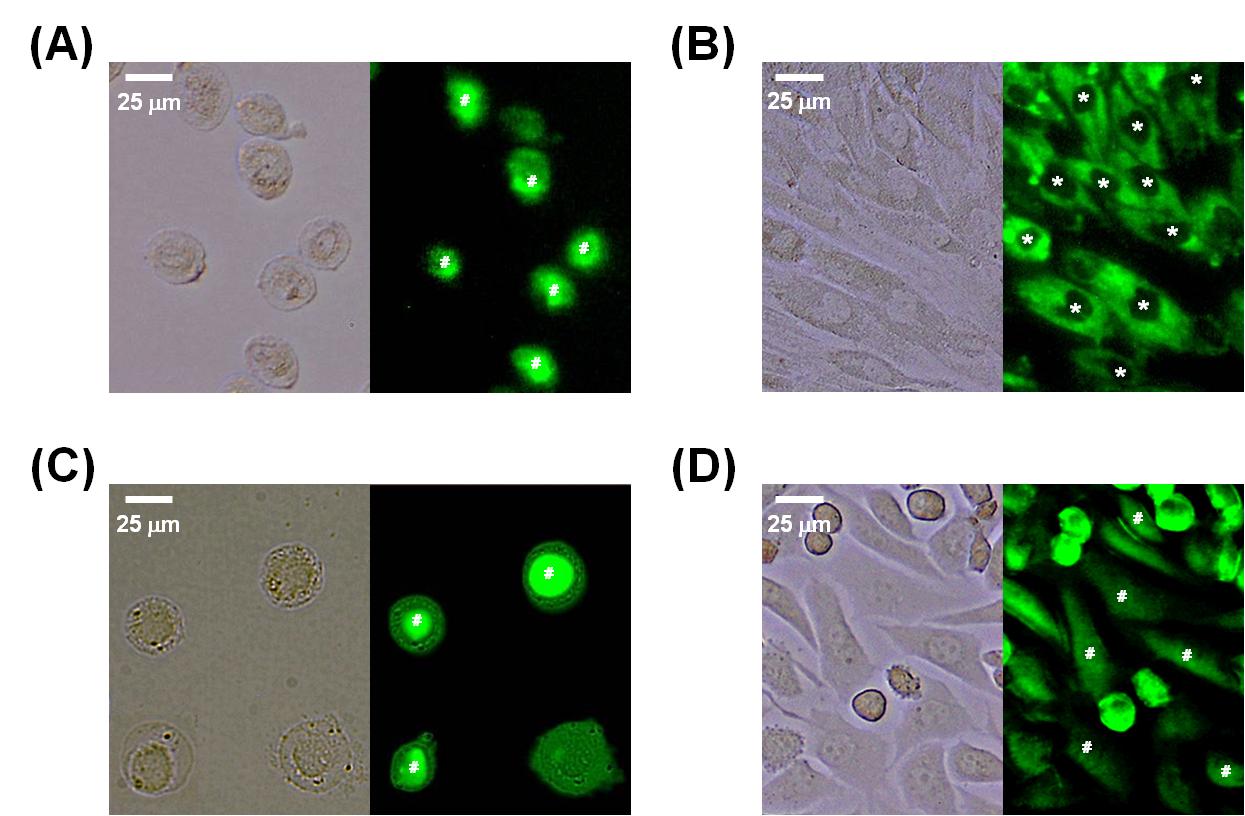


**Supplementary Figure S1.** Fluorescence microscopic photographs of HDFs (A and B) and L-929 cells (C and D), which were suspended (A and C) in PBS with 50 M FITC-EGCG treatment for 4 h or cultured (B and D) in the media with 100 M FITC-EGCG treatment for 8 h. The asterisks in (A and B) and sharps in (C and D) indicate the nucleus of HDFs and L-929 cells, respectively. All photographs (original magnification, × 250) shown in this figure are representative of four independent experiments with similar results.
